# Supplementary material for: Predictors of Mortality in Hemodialyzed Patients after SARS-CoV-2 Infection
Source: MDPI journal article supplement (doi:10.3390/jcm11020285), 2022-01-06
Supplement: s1 [file s1]

Table S1 Predictors of 3 – month mortality. Multivariable logistic regression.

| Variable                          | OR   | Lower 95% CI | Upper 95% CI | p-value |
|-----------------------------------|------|--------------|--------------|---------|
| Chronic D-vitamin supplementation | 0,74 | 0,24         | 2,33         | 0,61    |
| Age > 65 y                        | 2,31 | 0,45         | 11,94        | 0,32    |
| Blood type 0                      | 0,49 | 0,14         | 1,70         | 0,26    |
| D-Dimer > 1500 ng/mL              | 6,00 | 1,94         | 18,53        | <0,01   |
| Clinical Frailty Scale >3         | 8,36 | 1,81         | 38,63        | <0,01   |
| CRP > 118 mg/L                    | 3,77 | 1,09         | 13,02        | 0,04    |

Table S2 Baseline characteristic, clinical presentation and laboratory findings on hospital admission of HD patients with COVID-19 who survived and those died during 3 months after discharge.

| Variable                                  | Survivors<br>n=80 | Died after discharge<br>n=9 | p-value |
|-------------------------------------------|-------------------|-----------------------------|---------|
| Sex                                       |                   |                             |         |
| Male                                      | 41 (51.25)        | 4 (44.46)                   | p>0.1   |
| Female                                    | 39 (48.75)        | 5 (55.55)                   | p>0.1   |
| Age, years                                | 71.0 (61-77)      | 74.00 (68-82)               | p>0.1   |
| Blood group                               |                   |                             |         |
| A                                         | 31(38.0)          | 5 (55.54)                   | p>0.1   |
| B                                         | 13 (16.25)        | 2 (22.22)                   | p>0.1   |
| AB                                        | 5 (6.25)          | 0 (0.0)                     | p>0.1   |
| 0                                         | 31 (38.75)        | 2 (22.22)                   | p>0.1   |
| Body mass index, kg/m2                    | 26.0 (22.0-29.0)  | 23.74 (18.53-36.46)         | p>0.1   |
| Dialysis vintages, months                 | 37.5 (17-90)      | 59 (18-88)                  | p>0.1   |
| Dialysis dose per week, hours             | 12 (12-12)        | 12 (12-12)                  | p>0.1   |
| Past kidney transplantation               | 7 (8.75)          | 0 (0.0)                     | p>0.1   |
| Comorbidities                             |                   |                             |         |
| Diabetes                                  | 42 (52.5)         | 5 (55.54)                   | p>0.1   |
| Hypertension                              | 77 (96.25)        | 9 (100.0)                   | p>0.1   |
| Chronic pulmonary disease                 | 4 (5.0)           | 1 (11.11)                   | p>0.1   |
| Ischemic heart disease                    | 29 (36.25)        | 4 (44.46)                   | p>0.1   |
| Congestive heart failure                  | 29 (36.25)        | 5 (55.54)                   | p>0.1   |
| Malignancy                                | 6 (7.5)           | 0 (0.0)                     | p>0.1   |
| Charlson comorbidity index (age adjusted) | 7 (6-9)           | 8 (7-10)                    | p>0.1   |
| Clinical Frailty Scale                    | 4 (3-5)           | 5 (4-6)                     | p=0.003 |
| Medications:                              |                   |                             |         |
| ACE inhibitors                            | 15 (18.75)        | 4 (44.46)                   | p=0.07  |
| ARBs                                      | 8 (10)            | 1 (11.11)                   | p>0.1   |
| Calcium channel blockers                  | 25 (31.25)        | 4 (44.46)                   | p>0.1   |
| Beta-blockers                             | 59 (73.75)        | 7 (77.77)                   | p>0.1   |
| Statins                                   | 37 (46.25)        | 5 (55.54)                   | p>0.1   |
| Oral anticoagulant                        | 6 (7.5)           | 1 (11.11)                   | p>0.1   |
| LMWH between dialysis days                | 17 (21.25)        | 3 (33.33)                   | p>0.1   |
| Active oral vitamin D                     | 57 (71.25)        | 4 (44.46)                   | p=0.1   |
| Epoetin beta IU per week                  | 6000 (3500-6000)  | 6000 (4000-9000)            | p>0.1   |
| COVID-19 disease severity on admission    |                   |                             |         |
| Asymptomatic-Mild                         | 68 (85)           | 5 (55.54)                   | p=0.03  |
| Moderate-Severe                           | 12 (15)           | 4 (44.46)                   | p=0.03  |
| Physical examination on admission:        |                   |                             |         |
| Heart rate, beats per min                 | 80 (73-90)        | 85 (81-86.5)                | p>0.1   |
| Respiratory rate, breaths per min         | 16 (15-17)        | 18 (12-20)                  | p>0.1   |
| Oxygen saturation, %                      | 95 (92-97)        | 93 (89.5-95)                | p>0.1   |
| Systolic blood pressure, mmHg             | 130 (122-152)     | 120 (115-154)               | p>0.1   |
| Diastolic blood pressure, mmHg            | 80 (70-90)        | 77 (62-80)                  | p>0.1   |
| Temperature °C                            | 36.7 (36.4-37)    | 36.7 (36.4-37.4)            | p>0.1   |

|                                                                                                                                                                                            |                       |                       |        |
|--------------------------------------------------------------------------------------------------------------------------------------------------------------------------------------------|-----------------------|-----------------------|--------|
| Laboratory findings on admission                                                                                                                                                           |                       |                       |        |
| White blood cell count, x 10 <sup>9</sup> /l                                                                                                                                               | 5.12 (3.99-8.11)      | 5.07 (4.2-5.63)       | p>0.1  |
| Lymphocyte count/ mm <sup>3</sup>                                                                                                                                                          | 0.92 (0.63-1.4)       | 0.64 (0.41-0.84)      | p>0.1  |
| Hemoglobin, g/dl                                                                                                                                                                           | 11.1 (10.0-11.6)      | 9.5 (9.1-10.4)        | p>0.1  |
| Platelet count, x 10 <sup>9</sup> /l                                                                                                                                                       | 195.5 (149-239)       | 171 (127-205)         | p>0.1  |
| CRP, mg/l                                                                                                                                                                                  | 34.5 (9.1-95.1)       | 90.1 (28.5-119)       | p>0.01 |
| D-dimer, ng/ml                                                                                                                                                                             | 1106.5 (724.9-1491.1) | 1582.7 (624.1-3262.5) | p=0.01 |
| Procalcitonin, ng/ml                                                                                                                                                                       | 0.35 (0.26-0.64)      | 0.52 (0.52-0.52)      | p>0.1  |
| Ferritin, ng/ml                                                                                                                                                                            | 1306 (777.9-1902.0)   | no data               | -      |
| ALAT U/l                                                                                                                                                                                   | 20.5 (12-30)          | 17 (16-19)            | p>0.1  |
| pO <sub>2</sub> , mmHg                                                                                                                                                                     | 71.7 (54.2-87.6)      | 71 (60.1-73.9)        | p>0.1  |
| pCO <sub>2</sub> , mmHg                                                                                                                                                                    | 33.85 (28.6-36.9)     | 27.2 (24.9-35.5)      | p>0.1  |
| Data is n (%) or median (IQR), unless otherwise specified; HD, hemodialyzed; ACE, angiotensin converting enzyme; ARB, angiotensin II receptor blocker; LMWH, low molecular weight heparin. |                       |                       |        |
